# Supplementary material
Source: Royal Society of Chemistry journal article supplement (doi:10.1039/d6ma00088f)
Supplement: d6ma00088f1.pdf [file d6ma00088f1.pdf]

Supplementary Information (SI) for Journal of Materials Advances.  
This journal is © The Royal Society of Chemistry 2025

## Supporting Information

### Design of Experiments guided Hydrothermal Synthesis of $\text{CuFeO}_2$ Photocathodes for Photoelectrochemical Hydrogen Evolution

Mohamed El Idrissi,<sup>a,b</sup> Jonathan Pöttker-Menke,<sup>a</sup> Ying Kong,<sup>a</sup> Mohammed Abd-Lefdil,<sup>b</sup> Lahoucine Atourki,<sup>b</sup> and Bastian Timo Mei,<sup>a,\*</sup>

<sup>a</sup> Laboratory of Industrial Chemistry, Ruhr-University Bochum, Universitätsstraße 150, 44801 Bochum, Germany. E-mail: bastian.mei@rub.de

<sup>b</sup> MANAPSE Lab, Faculty of Science, Mohammed V University in Rabat, avenue Ibn Batouta, P.B. 1014, Rabat, Morocco

**Table S1** : Box-Behnken experimental design matrix and corresponding photocurrent density (E) response measured at 0.4 V vs. RHE for all CuFeO<sub>2</sub> photocathodes.

| Run Order | Hydrothermal Synthesis Temperature (°C) | Hydrothermal Synthesis Time (Hours) | Annealing Temperature (°C) | Annealing Time (Hours) | Current Density (mA/cm <sup>2</sup> ) at 0.4V vs RHE |
|-----------|-----------------------------------------|-------------------------------------|----------------------------|------------------------|------------------------------------------------------|
| 1         | 110                                     | 1                                   | 600                        | 4                      | -1.6715                                              |
| 2         | 170                                     | 1                                   | 600                        | 4                      | -1.01167                                             |
| 3         | 110                                     | 12                                  | 600                        | 4                      | -1.18633                                             |
| 4         | 170                                     | 12                                  | 600                        | 4                      | -0.5265                                              |
| 5         | 140                                     | 6.5                                 | 550                        | 1                      | -1.04367                                             |
| 6         | 140                                     | 6.5                                 | 650                        | 1                      | -1.26283                                             |
| 7         | 140                                     | 6.5                                 | 550                        | 7                      | -0.93517                                             |
| 8         | 140                                     | 6.5                                 | 650                        | 7                      | -1.15433                                             |
| 9         | 110                                     | 6.5                                 | 600                        | 1                      | -1.48317                                             |
| 10        | 170                                     | 6.5                                 | 600                        | 1                      | -0.82333                                             |
| 11        | 110                                     | 6.5                                 | 600                        | 7                      | -1.37467                                             |
| 12        | 170                                     | 6.5                                 | 600                        | 7                      | -0.71483                                             |
| 13        | 140                                     | 1                                   | 550                        | 4                      | -1.232                                               |
| 14        | 140                                     | 12                                  | 550                        | 4                      | -0.74683                                             |
| 15        | 140                                     | 1                                   | 650                        | 4                      | -1.45117                                             |
| 16        | 140                                     | 12                                  | 650                        | 4                      | -0.966                                               |
| 17        | 110                                     | 6.5                                 | 550                        | 4                      | -1.31933                                             |
| 18        | 170                                     | 6.5                                 | 550                        | 4                      | -0.6595                                              |
| 19        | 110                                     | 6.5                                 | 650                        | 4                      | -1.5385                                              |
| 20        | 170                                     | 6.5                                 | 650                        | 4                      | -0.87867                                             |
| 21        | 140                                     | 1                                   | 600                        | 1                      | -1.39583                                             |
| 22        | 140                                     | 12                                  | 600                        | 1                      | -0.91067                                             |
| 23        | 140                                     | 1                                   | 600                        | 7                      | -1.28733                                             |
| 24        | 140                                     | 12                                  | 600                        | 7                      | -0.80217                                             |
| 25        | 140                                     | 6.5                                 | 600                        | 4                      | -1.099                                               |

**Table S2:** Full Analysis of Variance (ANOVA) table for the fitted quadratic model, showing that all linear terms (A, B, C, D) are highly significant ( $p < 0.05$ ), while all quadratic and interaction terms are statistically insignificant ( $p = 1.000$ ).

|             | DF | Sum of Squares | Mean Square | F Value     | Prob>F      |
|-------------|----|----------------|-------------|-------------|-------------|
| A           | 1  | 1.30614        | 1.30614     | 6.5307E10   | 2.07158E-50 |
| B           | 1  | 0.70616        | 0.70616     | 3.5308E10   | 4.48471E-49 |
| C           | 1  | 0.1441         | 0.1441      | 7.2051E9    | 1.26736E-45 |
| D           | 1  | 0.03532        | 0.03532     | 1.76584E9   | 1.43333E-42 |
| A*A         | 1  | 1.30626E-31    | 1.30626E-31 | 6.5313E-21  | 1           |
| B*B         | 1  | 1.66213E-31    | 1.66213E-31 | 8.31065E-21 | 1           |
| C*C         | 1  | 1.3875E-32     | 1.3875E-32  | 6.9375E-22  | 1           |
| D*D         | 1  | 2.30273E-33    | 2.30273E-33 | 1.15136E-22 | 1           |
| A*B         | 1  | 1.11657E-31    | 1.11657E-31 | 5.58285E-21 | 1           |
| A*C         | 1  | 3.08149E-33    | 3.08149E-33 | 1.54074E-22 | 1           |
| A*D         | 1  | 0              | 0           | 0           | 1           |
| B*C         | 1  | 3.08157E-33    | 3.08157E-33 | 1.54079E-22 | 1           |
| B*D         | 1  | 3.08149E-33    | 3.08149E-33 | 1.54074E-22 | 1           |
| C*D         | 1  | 3.10267E-32    | 3.10267E-32 | 1.55133E-21 | 1           |
| Error       | 10 | 2E-10          | 2E-11       |             |             |
| Lack of fit | 10 | 2E-10          | 2E-11       | --          | --          |
| Pure Error  | 0  | 0              | --          |             |             |
| Total       | 24 | 2.19172        |             |             |             |

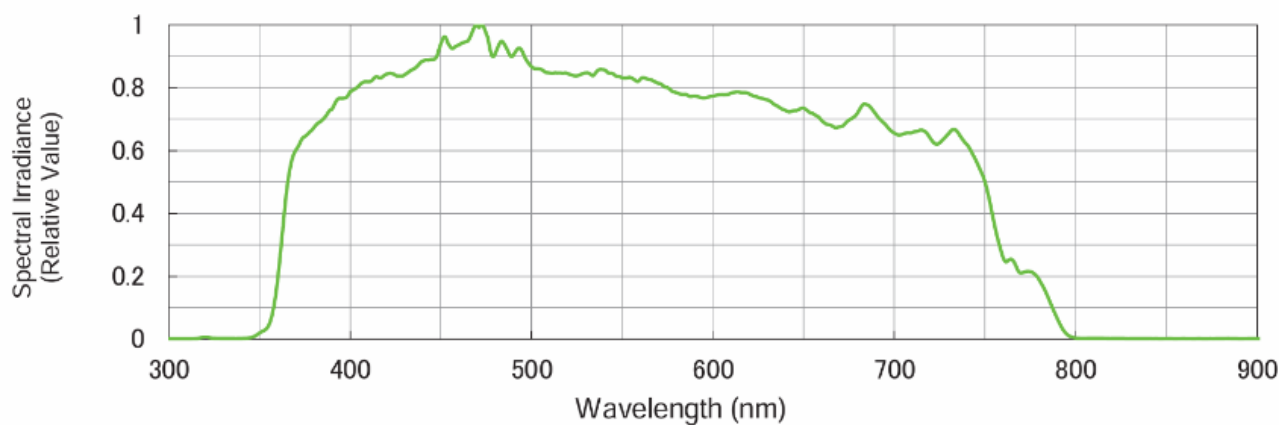

**Figure S1:** Spectral distribution of MAX-303 with UV Lamp and VIS Mirror Module measured by fiber spectrometer.

To gain further insight into the crystallographic structure, HRTEM analysis was performed on the powder synthesized at 140 °C. Lattice fringe imaging revealed two dominant facet orientations. Figure S2a shows well-defined fringes with a measured spacing of 0.251 nm, corresponding to the (012) plane. The statistical distribution of this spacing, confirmed by histogram analysis (Figure S2b), affirms its prevalence. Similarly, Figure S2c displays lattice fringes with a spacing of 0.152 nm, attributed to the (110) plane, a finding supported by the accompanying histogram (Figure S2d). These results corroborate the XRD findings and confirm that the  $\text{CuFeO}_2$  crystals predominantly expose (012) and (110) facets.

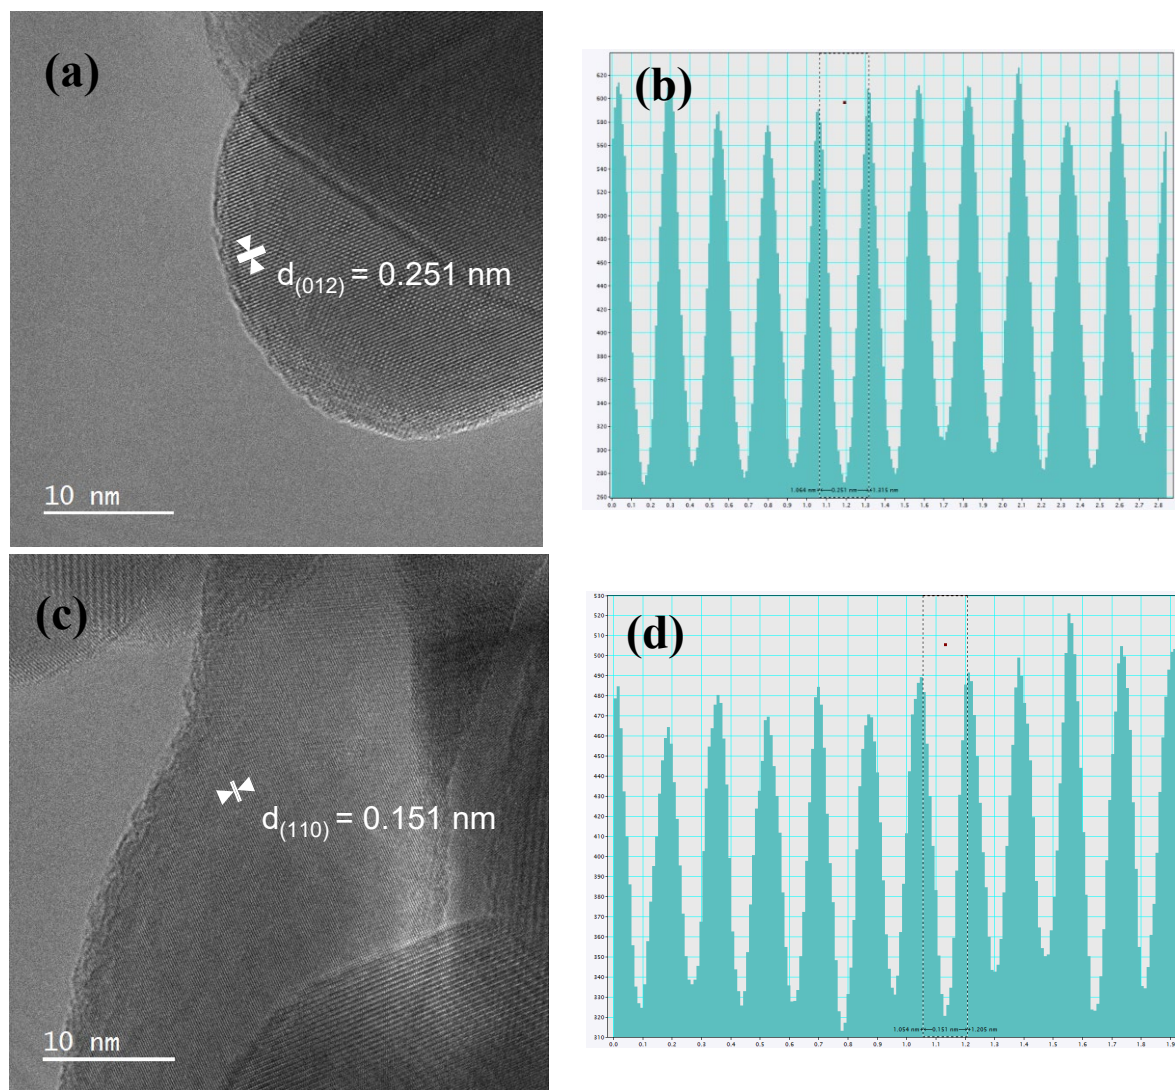

**Figure S2:** HRTEM analysis of  $\text{CuFeO}_2$  synthesized at 140 °C for 1 hour confirming dominant facet orientations. (a) Lattice fringes of the (012) plane ( $d$ -spacing = 0.251 nm). (b) Histogram of lattice periodicity for the (012) plane. (c) Lattice fringes of the (110) plane ( $d$ -spacing = 0.152 nm). (d) Histogram of lattice periodicity for the (110) plane.

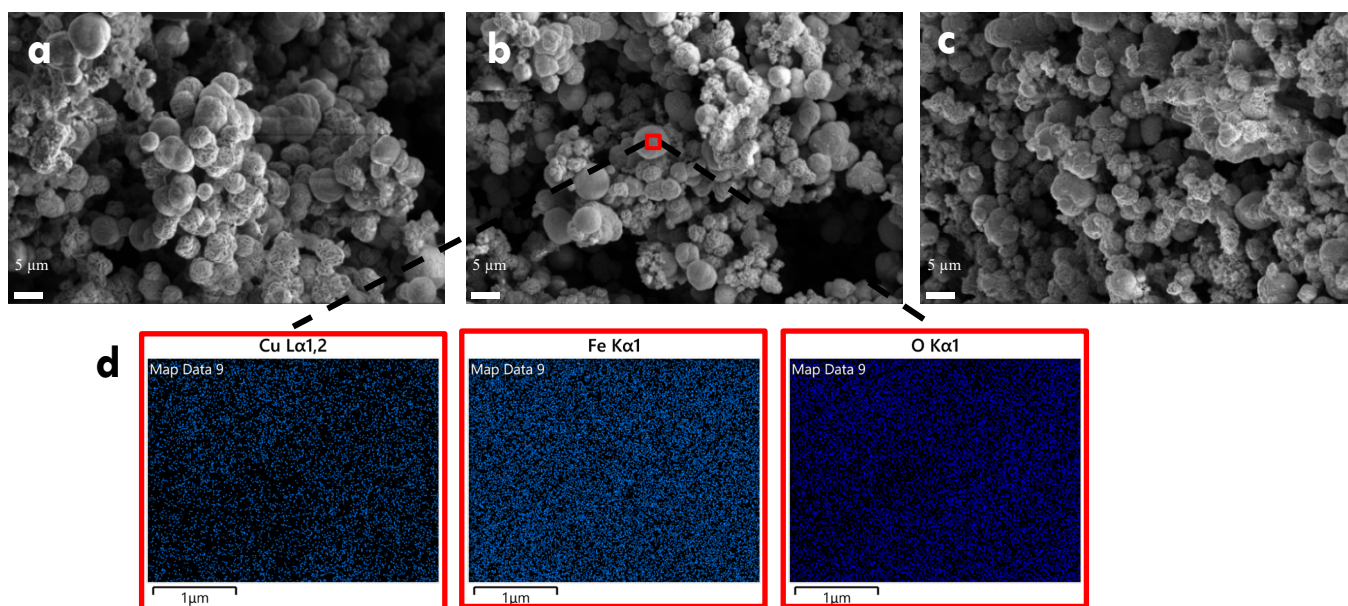

**Figure S3:** SEM images showing the surface morphology of  $\text{CuFeO}_2$  powders synthesized at (a) 110 °C, (b) 140 °C, and (c) 170 °C for 1 hour. (d) Elemental mapping (Cu, Fe, O) of the powder synthesized at 140 °C, demonstrating uniform elemental distribution.

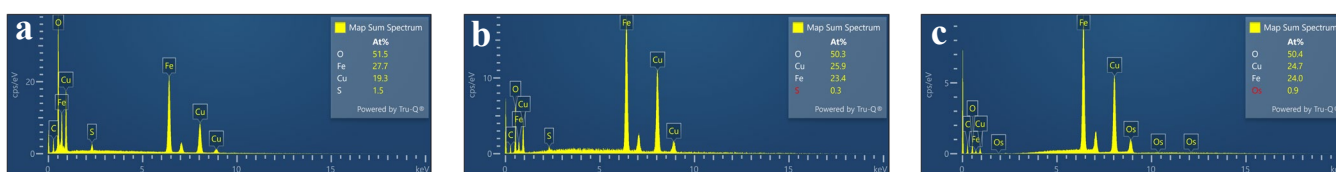

**Figure S4:** EDX spectra and quantitative atomic percentage analysis (inset) of  $\text{CuFeO}_2$  powders synthesized at (a) 110 °C, (b) 140 °C, and (c) 170 °C for 1 hour, confirming stoichiometric composition (~50% O, ~25% Cu, ~25% Fe) across all samples.

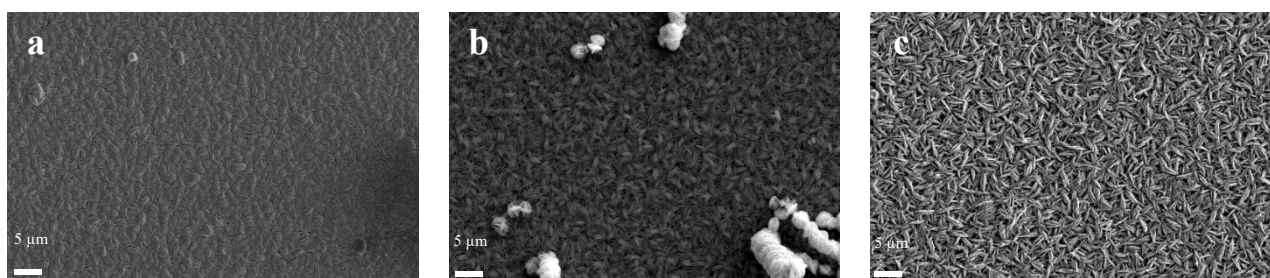

**Figure S5:** SEM images of as-prepared  $\text{CuFeO}_2$  thin films derived from powders synthesized at (a) 110 °C, (b) 140 °C, and (c) 170 °C. Films from higher temperature syntheses show denser packing and improved continuity.

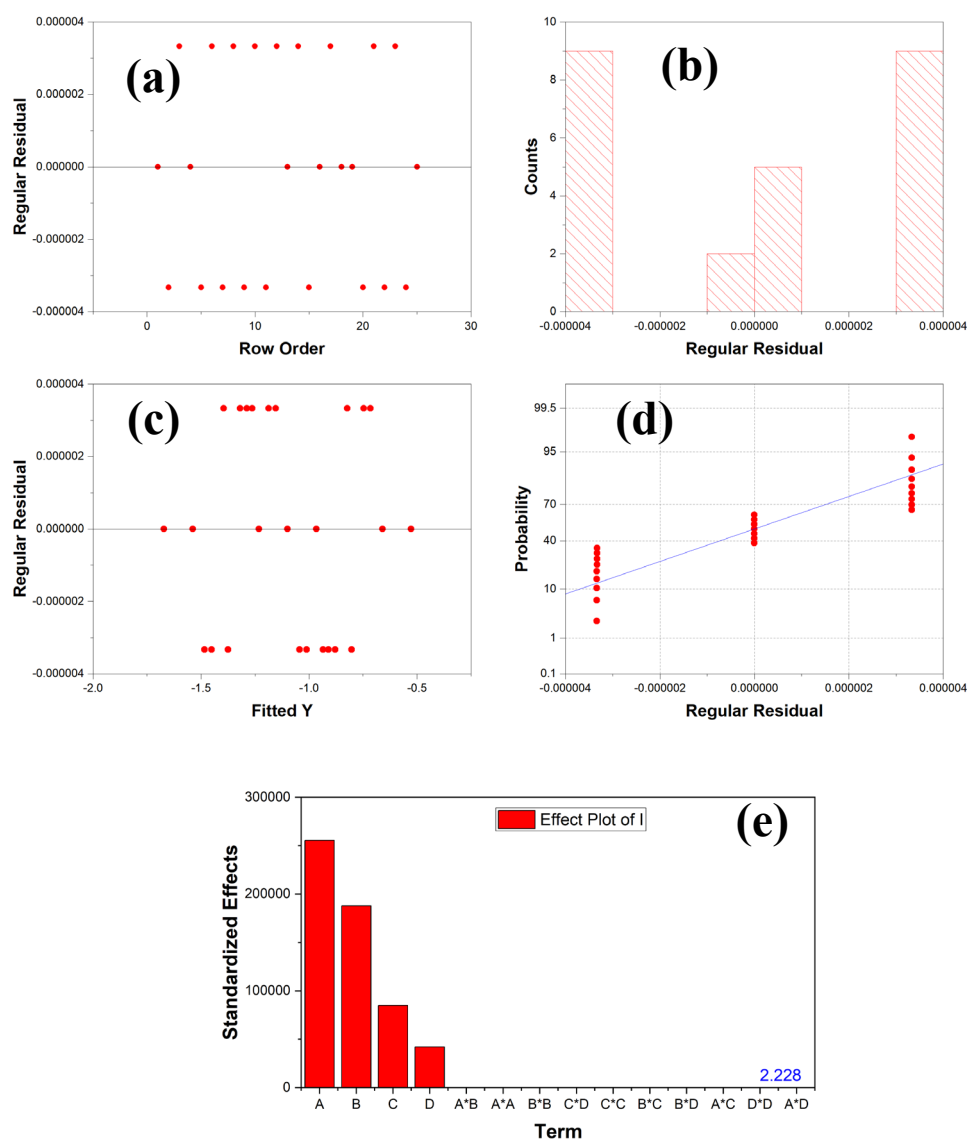

**Figure S6:** Diagnostic plots for the linear regression model. (a) Residuals versus run order. (b) Histogram of residuals. (c) Residuals versus fitted values. (d) Normal probability plot of residuals. (e) Pareto chart of the standardized effects of the model terms (A: Hydrothermal Temp., B: Hydrothermal Time, C: Annealing Temp., D: Annealing Time).

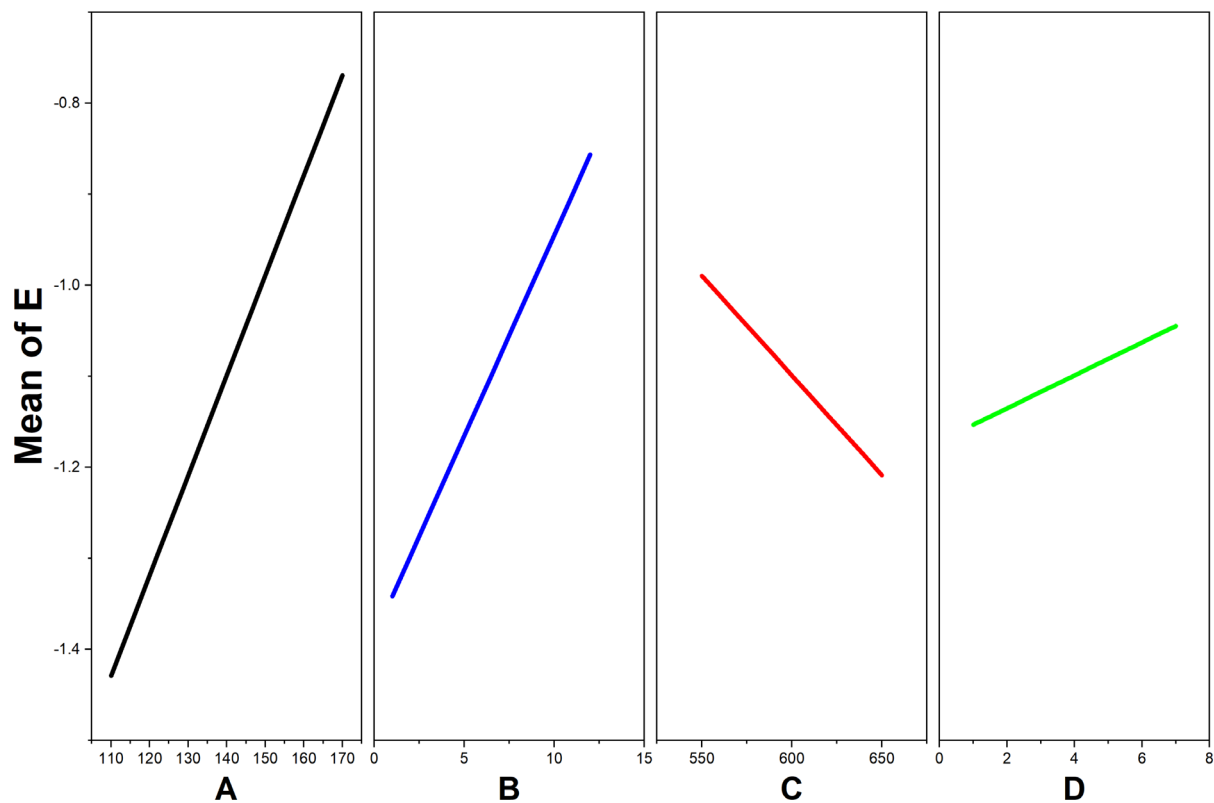

**Figure S7:** Main effects plots for the four synthesis parameters on photocurrent density at 0.4 V vs. RHE. Hydrothermal temperature (A) is the most influential parameter, with performance decreasing as temperature increases.

## Raman Spectrometry

Raman spectroscopy was used to confirm the phase purity and vibrational fingerprint of the in-situ grown films. The  $\text{CuFeO}_2$  thin films (measured on FTO) and hydrothermally synthesized  $\text{CuFeO}_2$  powder both show the characteristic  $E_g$  and  $A_{1g}$  modes at  $\sim 342 \text{ cm}^{-1}$  and  $\sim 692 \text{ cm}^{-1}$ , respectively, consistent with the 3R- $\text{CuFeO}_2$  structure. The  $A_{1g}$  band at  $\sim 692 \text{ cm}^{-1}$  is assigned to Cu–O stretching vibrations along the  $c$ -axis, while the  $E_g$  band at  $\sim 342 \text{ cm}^{-1}$  corresponds to vibrations within the  $ab$ -plane. The FTO substrate spectrum is included to show substrate features and to verify that the observed  $\text{CuFeO}_2$  peaks are not artefacts of the substrate.

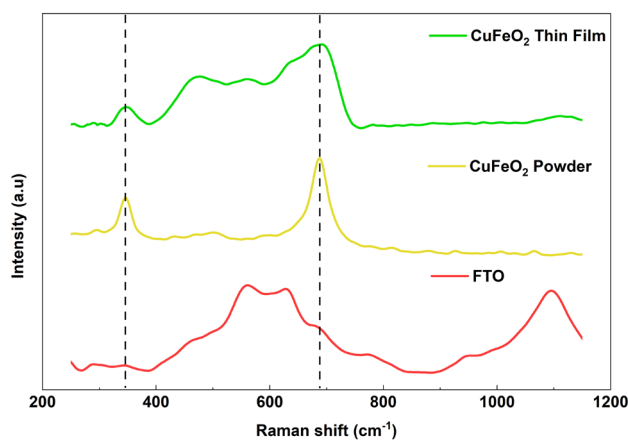

**Figure S8:** Raman spectra of FTO substrate (red),  $\text{CuFeO}_2$  powder (yellow), and  $\text{CuFeO}_2$  thin film on FTO (green). Vertical dashed lines mark the  $E_g$  ( $\sim 342 \text{ cm}^{-1}$ ) and  $A_{1g}$  ( $\sim 692 \text{ cm}^{-1}$ ) modes characteristic of 3R- $\text{CuFeO}_2$ . The  $\text{CuFeO}_2$  powder and thin-film spectra exhibit the same principal vibrational bands, confirming phase identity. The FTO trace is shown to highlight substrate contributions.

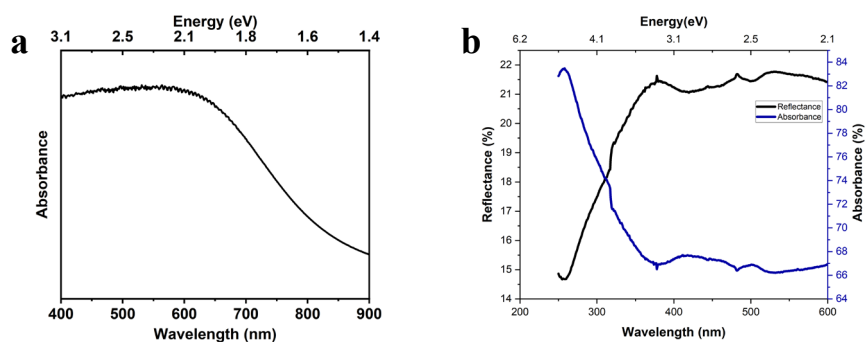

**Figure S9:** Comprehensive optoelectronic characterization of the optimized  $\text{CuFeO}_2$  photocathode. (a) UV-Vis absorption spectrum, showing an absorption edge at  $\sim 650$  nm. (b) Absorbance (T) and reflectance (R) spectra measured with an integrating sphere.

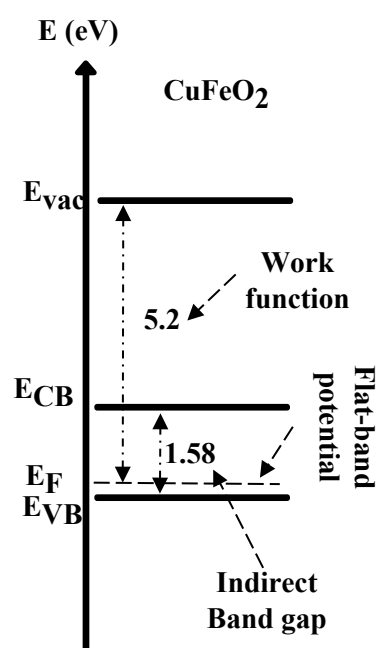

**Figure S10:** Energy band diagram of  $\text{CuFeO}_2$  constructed from experimental data, showing favourable band alignment for hydrogen evolution. The photocathode was synthesized hydrothermally at  $110^\circ\text{C}$  for 1 h and annealed at  $650^\circ\text{C}$  for 1 h.

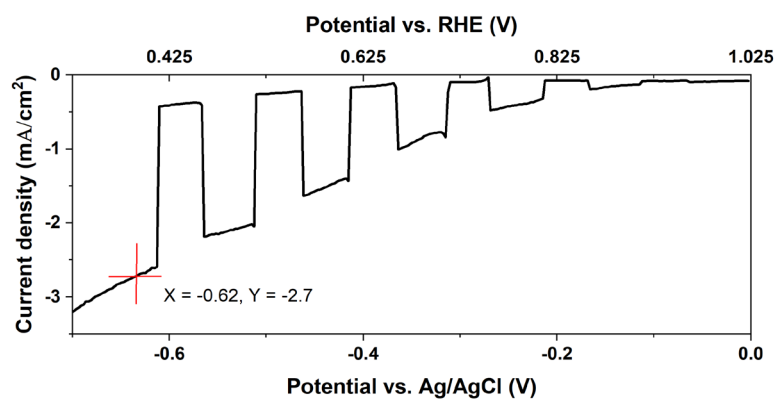

**Figure S11:** Oxygen reduction reaction (ORR) activity. LSV of the optimized  $\text{CuFeO}_2$  photocathode measured in  $\text{O}_2$ -saturated 1 M NaOH under 1 Sun illumination, showing a photocurrent density of  $-2.7$   $\text{mA cm}^{-2}$ .

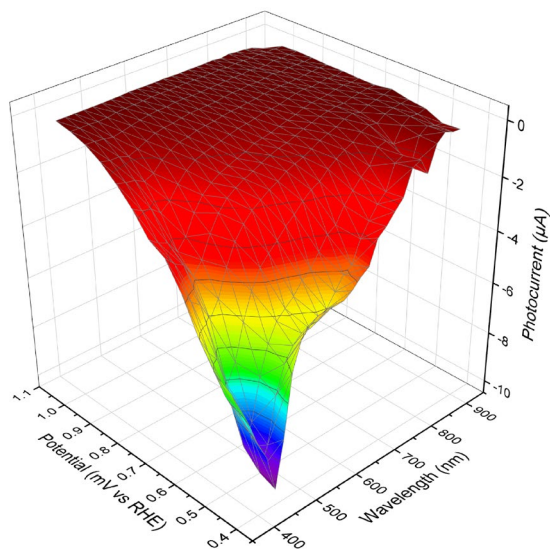

**Figure S12:** Wavelength-Dependent Photocurrent Response of Optimized CuFeO<sub>2</sub> Photocathode on FTO in in N<sub>2</sub>-Saturated 1 M NaOH.

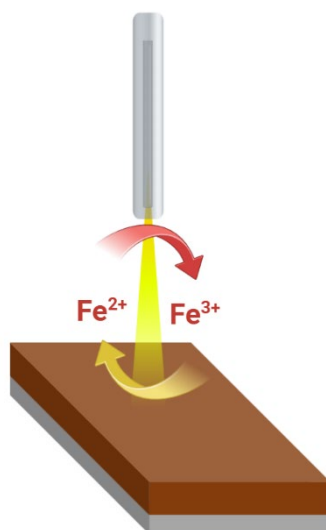

**Figure S13:** Schematic of the SPECM measurement: optical coupling to the Au microelectrode tip and the electrochemical configuration (Au tip at +1.5 V vs RHE, CuFeO<sub>2</sub> at +0.4 V vs RHE).

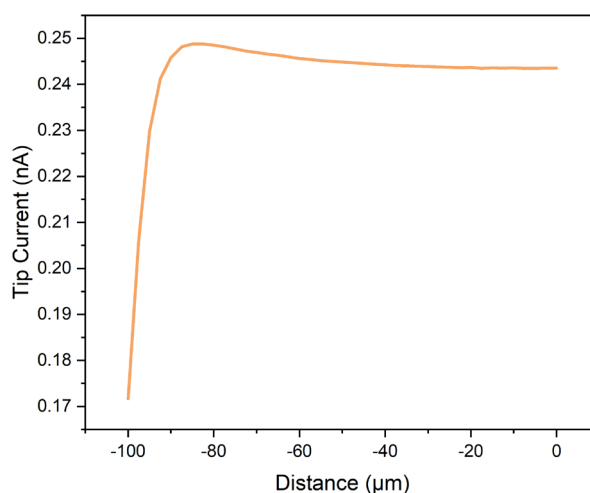

**Figure S14:** Z-approach curves for SPECM tip positioning. Negative feedback approach curves recorded in 5 mM potassium ferricyanide and 100 mM KCl with the tip polarized at 0.5 V vs. Ag/AgCl and the CuFeO<sub>2</sub> electrode unbiased.

### Calculation of Solar Photocurrent Density from IPCE Data

To estimate the theoretical solar photocurrent density of the optimized CuFeO<sub>2</sub> photocathode, we numerically integrated the wavelength-dependent incident photon-to-current efficiency (IPCE) with the corresponding incident light power. The calculation was performed using Python, based on the following equation:

$$J_{ph} = q \int IPCE(\lambda) \times \Phi(\lambda) d\lambda \quad (1)$$

Where:

- $J_{ph}$  is the solar photocurrent density (A/cm<sup>2</sup>)
- $q$  is the elementary charge ( $1.602 \times 10^{-19}$  C)
- $IPCE(\lambda)$  is the IPCE at wavelength  $\lambda$  (unitless)
- $\Phi(\lambda)$  is the photon flux (photons/cm<sup>2</sup>·s·nm), calculated from the incident light power

The photon flux at each wavelength was computed using:

$$\Phi(\lambda) = \frac{P(\lambda)}{hc/\lambda} \quad (2)$$

Where:

- $P(\lambda)$  is the incident light power in watts (converted from  $\mu$ W)
- $h$  is Planck's constant ( $6.626 \times 10^{-34}$  J·s)
- $c$  is the speed of light ( $3 \times 10^8$  m/s)
- $\lambda$  is the wavelength in meters

The IPCE data were stored in an Excel file named IPCE.xlsx, containing three columns: Wavelength (nm), IPCE (%) and Incident light ( $\mu$ W). The IPCE values were converted to fractional form, and the incident light power was used to calculate the photon flux at each wavelength. The integration was performed using the trapezoidal rule, and the final result was converted to mA/cm<sup>2</sup> for comparison with experimental PEC measurements.

### Energy-metric calculations

The calculations below use the experimentally measured H<sub>2</sub> production rate Figure S16 and Faradaic efficiency: H<sub>2</sub> rate = 1.036  $\mu$ mol·h<sup>-1</sup>, FE  $\approx$  0.40, Chronoamperometry (CA) duration  $t=1$  h=3600 s, illuminated area  $A=1.0$  cm<sup>2</sup>, and the working electrode potential  $V_{WE}=0.5$  V vs RHE. The Faraday constant is  $F=96485$  C mol<sup>-1</sup> and the Gibbs free energy for H<sub>2</sub> formation is  $\Delta G^\circ \approx 237$  kJmol<sup>-1</sup>.

Moles of H<sub>2</sub> produced during the 1 h CA (from GC):

$$n_{H_2} = 1.036 \mu\text{mol (over 1h)}. \quad (3)$$

Total charge that would be required to produce this H<sub>2</sub> at 100% FE:

$$Q_{theor} = 2Fn_{H_2} = 2 \times 96485 \times 1.036 \cdot 10^{-6} = 0.2 \text{ C} \quad (4)$$

Total measured charge consistent with the FE: Because FE = (H<sub>2</sub> produced) / (H<sub>2</sub> expected from charge), the measured total charge Q<sub>meas</sub> is:

$$Q_{meas} = \frac{Q_{theor}}{FE} = \frac{0.2}{0.4} = 0.49 \text{ C}. \quad (5)$$

Average current during the CA (over 1 h):

$$I_{avg} = \frac{Q_{theor}}{FE} = \frac{0.49}{3600} = 139 \mu A \quad (6)$$

Electrical energy input (working-electrode basis) during the 1 h CA:

$$E_{elec} = V_{WE} \times Q_{meas} = 0.25 \text{ J}. \quad (7)$$

Electrical energy per mole of H<sub>2</sub> (corrected for FE):

$$E_{per \text{ mol}} = \frac{E_{elec}}{n_{H_2}} = 241 \text{ KJ mol}^{-1} \quad (8)$$

$$E_{per \text{ kg}} = 33.2 \text{ KWh Kg}^{-1} \quad (9)$$

Solar-to-hydrogen (STH) efficiency estimate (illumination basis):

The H<sub>2</sub> production rate is:  $\dot{n}_{H_2} = n_{H_2}/t = 1.036/3600 = 2.878 \cdot 10^{-10} \text{ mol s}^{-1}$ . The chemical power stored as H<sub>2</sub> is:

$$P_{chem} = \dot{n}_{H_2} \times \Delta G^0 = 6.82 \cdot 10^{-6} \text{ W} \quad (10)$$

With incident optical power P<sub>in</sub> = 100 mW, the STH efficiency is:

$$\eta_{STH} = \frac{P_{chem}}{P_{in}} = 0.068 \text{ \%} \quad (11)$$

Using the GC-measured H<sub>2</sub> rate (1.036 μmol·h<sup>-1</sup>) and the Faradaic efficiency (≈40%), the working-electrode energy input (at +0.5 V vs RHE) corresponds to an electrical energy consumption of ≈241 kJ·mol<sup>-1</sup> H<sub>2</sub> (≈33.2 kWh·kg<sup>-1</sup>). The estimated STH efficiency based on incident 1-sun illumination (100 mW·cm<sup>-2</sup>, 1 cm<sup>2</sup>) is ≈0.068 %. These values are reported on a working electrode basis (WE potential × charge) and do not include any additional cell or counter electrode losses.

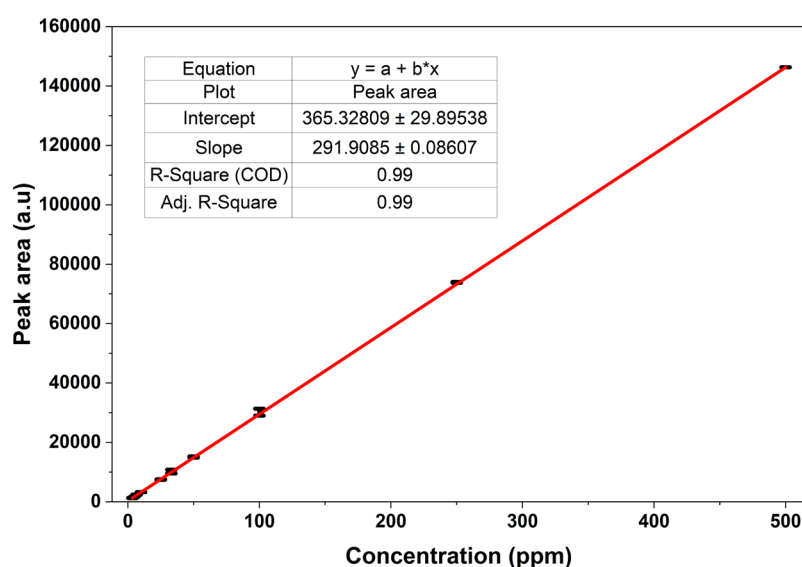

**Figure S15:** Calibration curve for hydrogen quantification by gas chromatography. The linear fit was performed using peak area (a.u.) versus H<sub>2</sub> concentration (ppm), yielding a slope of 291.9 and R<sup>2</sup> = 0.99. This calibration was used to calculate the H<sub>2</sub> evolution rate and Faradaic efficiency.

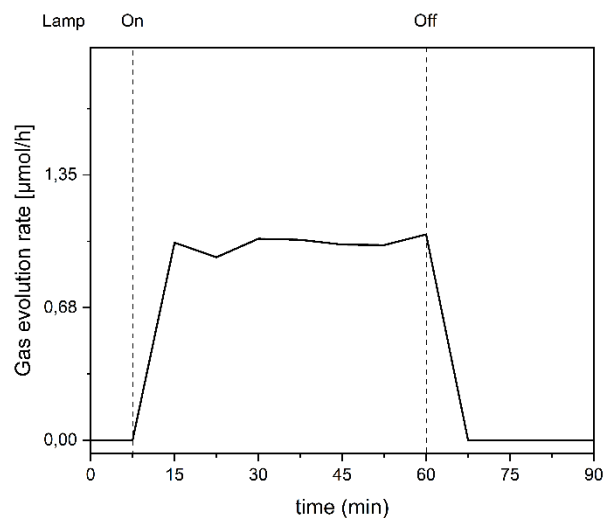

**Figure S16:** Hydrogen evolution rate vs time measured by online GC-BID during the 1 h CA at +0.5 V vs RHE, light on periods produce a constant H<sub>2</sub> generation rate of 1.036 μmol h<sup>-1</sup>, which drops to ≈0 when illumination is turned off, integrated H<sub>2</sub> and the corresponding charge yield an average Faradaic efficiency of ≈40%.

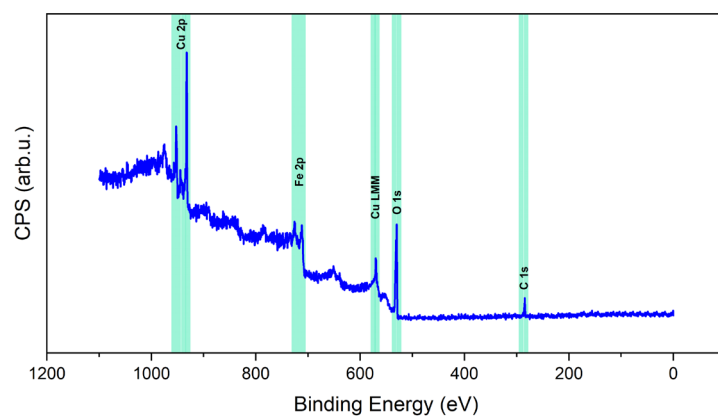

**Figure S17:** XPS survey spectrum of the pristine CuFeO<sub>2</sub> photocathode. The spectrum confirms the presence of Cu, Fe, and O with no detectable impurities.

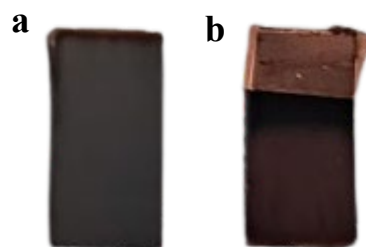

**Figure S18:** Visual evidence of degradation. Photographic images of the CuFeO<sub>2</sub> electrode (a) before and (b) after PEC operation, showing a colour change from dark green to brown.

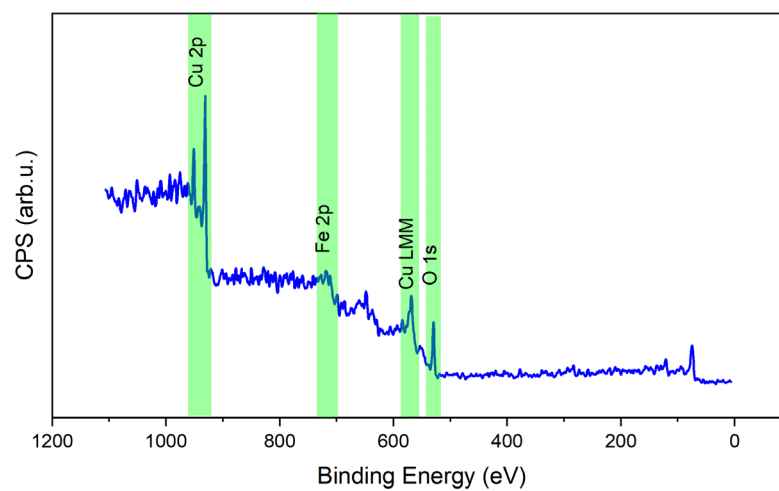

**Figure S19** : XPS survey spectrum of CuFeO<sub>2</sub> after PEC operation. The spectrum confirms that no external contaminants were introduced during PEC testing, despite the severe chemical reduction of the film.

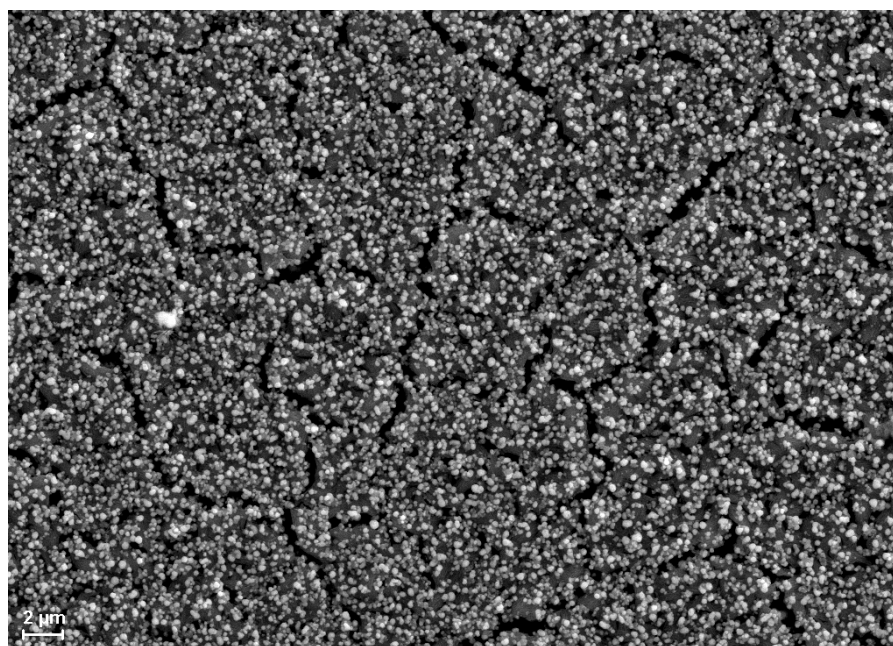

**Figure S20**: SEM image of CuFeO<sub>2</sub> after PEC operation. The micrograph shows significant morphological degradation, including agglomeration, consistent with the chemical instability revealed by XPS.

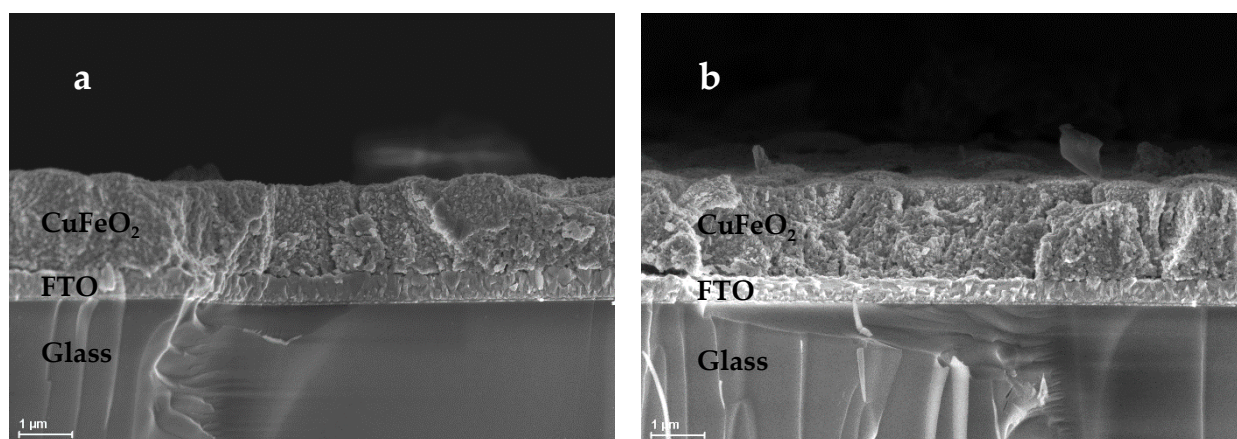

**Figure S21:** Cross-sectional SEM of FTO/CuFeO<sub>2</sub> photocathode (a) before PEC testing and (b) after 1-h chronoamperometry at +0.5 V vs RHE under 1-sun illumination.

**Table S3:** Comparative semiconductor and EIS parameters for bare CuFeO<sub>2</sub> photocathodes.

| Study          | Indirect band gap (eV)                | Direct band gap (eV) | Flat-band potential (V vs RHE) | R <sub>s</sub> (Ω·cm <sup>2</sup> ) | R <sub>ct</sub> (dark) (Ω·cm <sup>2</sup> ) | R <sub>ct</sub> (light) (Ω·cm <sup>2</sup> ) | C <sub>sc</sub> (dark) (μF·cm <sup>-2</sup> ) | C <sub>sc</sub> (light) (μF·cm <sup>-2</sup> ) |
|----------------|---------------------------------------|----------------------|--------------------------------|-------------------------------------|---------------------------------------------|----------------------------------------------|-----------------------------------------------|------------------------------------------------|
| This work      | 1.58                                  | 3.01                 | +1.01                          | 17                                  | 104                                         | 89.2                                         | 7.7                                           | 15                                             |
| Prévot et al., | 1.47                                  | 3.10                 | +1.01                          | -                                   | -                                           | -                                            | -                                             | -                                              |
| Präg et al.,   | 1.44 (Tauc) , 1.17 (phonon-corrected) | 3.30                 | +1.10                          | -                                   | -                                           | -                                            | -                                             | -                                              |

**Table S4:** Photoelectrochemical performance parameters for bare CuFeO<sub>2</sub> photocathodes

| Study                      | Photocurrent for ORR (O <sub>2</sub> , +0.4 V vs RHE) | Photocurrent for HER (N <sub>2</sub> /Ar, +0.4 V vs RHE) | IPCE / APCE (wavelength, potential)                                  | H <sub>2</sub> evolution rate (μmol·h <sup>-1</sup> ) | Faradaic Efficiency (FE)                                   |
|----------------------------|-------------------------------------------------------|----------------------------------------------------------|----------------------------------------------------------------------|-------------------------------------------------------|------------------------------------------------------------|
| This work                  | 2.7 mA·cm <sup>-2</sup>                               | 1.7 mA·cm <sup>-2</sup>                                  | IPCE 16% (400 nm, +0.4 V vs RHE), APCE 20% at 400 nm (+0.4 V vs RHE) | 0.0076 μmol·h <sup>-1</sup>                           | ≈ 40% (1 h CA at +0.5 V vs RHE, N <sub>2</sub> , 1 M NaOH) |
| Prévot et al. <sup>1</sup> | 1.05 mA·cm <sup>-2</sup>                              | negligible/poorly quantified                             | IPCE >10% at 400 nm (measured at +0.4 V vs RHE)                      | -                                                     | -                                                          |
| Präg et al. <sup>2</sup>   | 0.3 mA·cm <sup>-2</sup>                               | very low (μA·cm <sup>-2</sup> range)                     | IPCE up to ≈12.5% at 400 nm (measured at +0.4 V vs RHE)              | -                                                     | -                                                          |

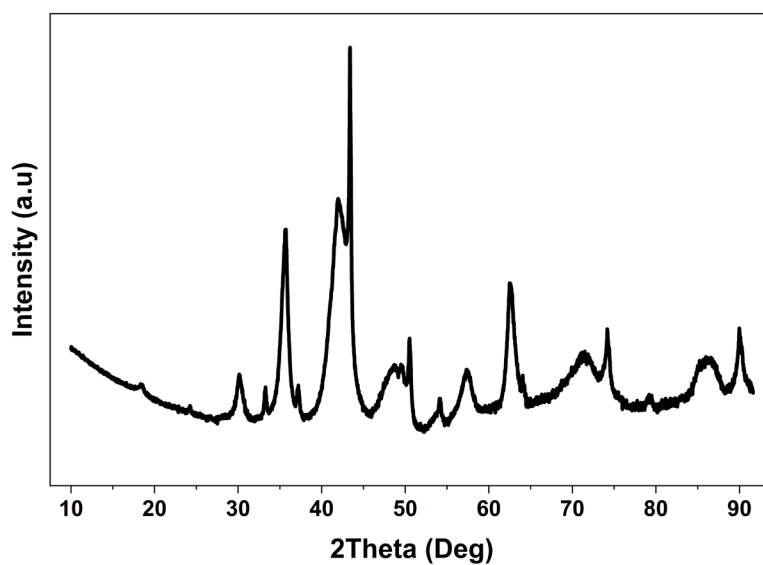

**Figure S22:** Post-catalysis X-ray diffraction (XRD) pattern of the CuFeO<sub>2</sub> photocathode after after 1-h chronoamperometry at +0.5 V vs RHE under 1-sun illumination. Note that the pattern was obtained from the powder scratched off the electrode.

## References

1. Prévot, Mathieu S., Néstor Guíjarro, and Kevin Sivula. "Enhancing the performance of a robust sol–gel-processed p-type delafossite CuFeO<sub>2</sub> photocathode for solar water reduction." *ChemSusChem* 8.8 (2015): 1359-1367.
2. Präg, Raphael, et al. "Photoelectrochemical Properties of CuFeO<sub>2</sub> Photocathodes Prepared by Pulsed Laser Deposition." *Chemistry of Materials* 36.16 (2024): 7764-778
